# Supplementary material for: Fe2+ doped in CsPbCl3 perovskite nanocrystals: impact on the luminescence and magnetic properties
Source: Royal Society of Chemistry journal article supplement (doi:10.1039/c9ra07069a), 2019-01-01
Supplement: c9ra07069a1.pdf [file c9ra07069a1.pdf]

## Supporting Information

### **Fe<sup>2+</sup> doped in CsPbCl<sub>3</sub> perovskite nanocrystals: impact on the luminescent and magnetic properties**

Yue Hu<sup>a</sup>, Xinyue Zhang<sup>b</sup>, Chaoqun Yang<sup>a</sup>, Ji Li<sup>a,b</sup>, Li Wang<sup>a,b,\*</sup>

<sup>a</sup>Key Laboratory of Functional Materials Physics and Chemistry of the Ministry of Education, Jilin Normal University, Siping 136000, China.

<sup>b</sup>National Demonstration Center for Experimental Physics Education, Jilin Normal University, Siping 136000, Chian

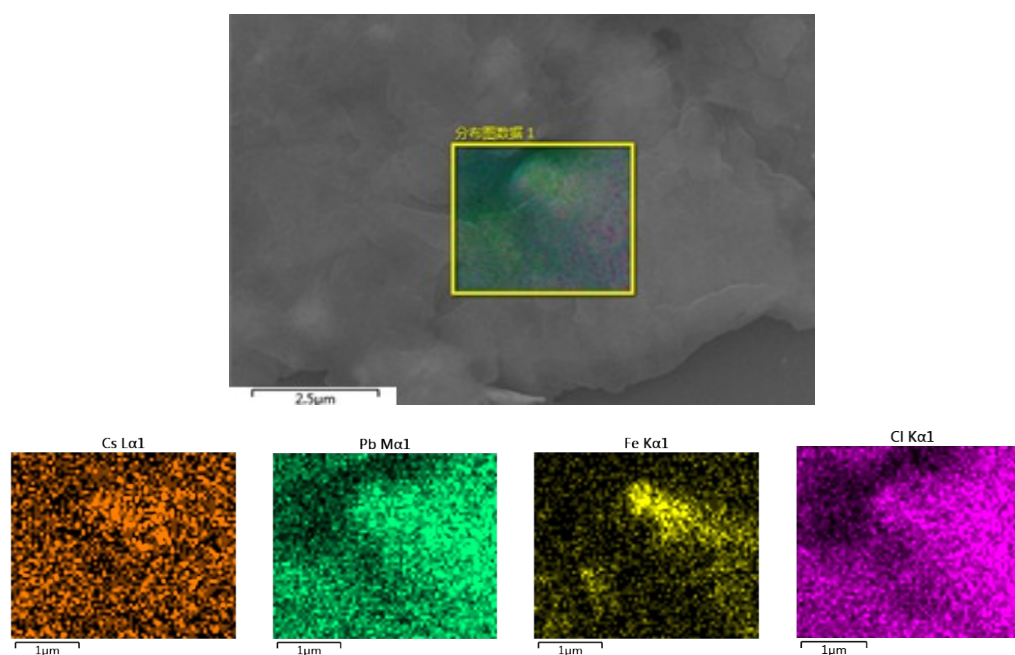

Fig. S1. FE-SEM and EDX mapping images of Fe doped CsPbCl<sub>3</sub> NCs with x=0.2.
